# Supplementary figures and images for: Non-genetic inheritance restraint of cell-to-cell variation
Source: eLife journal article supplement (doi:10.7554/elife.64779), 2021-02-01

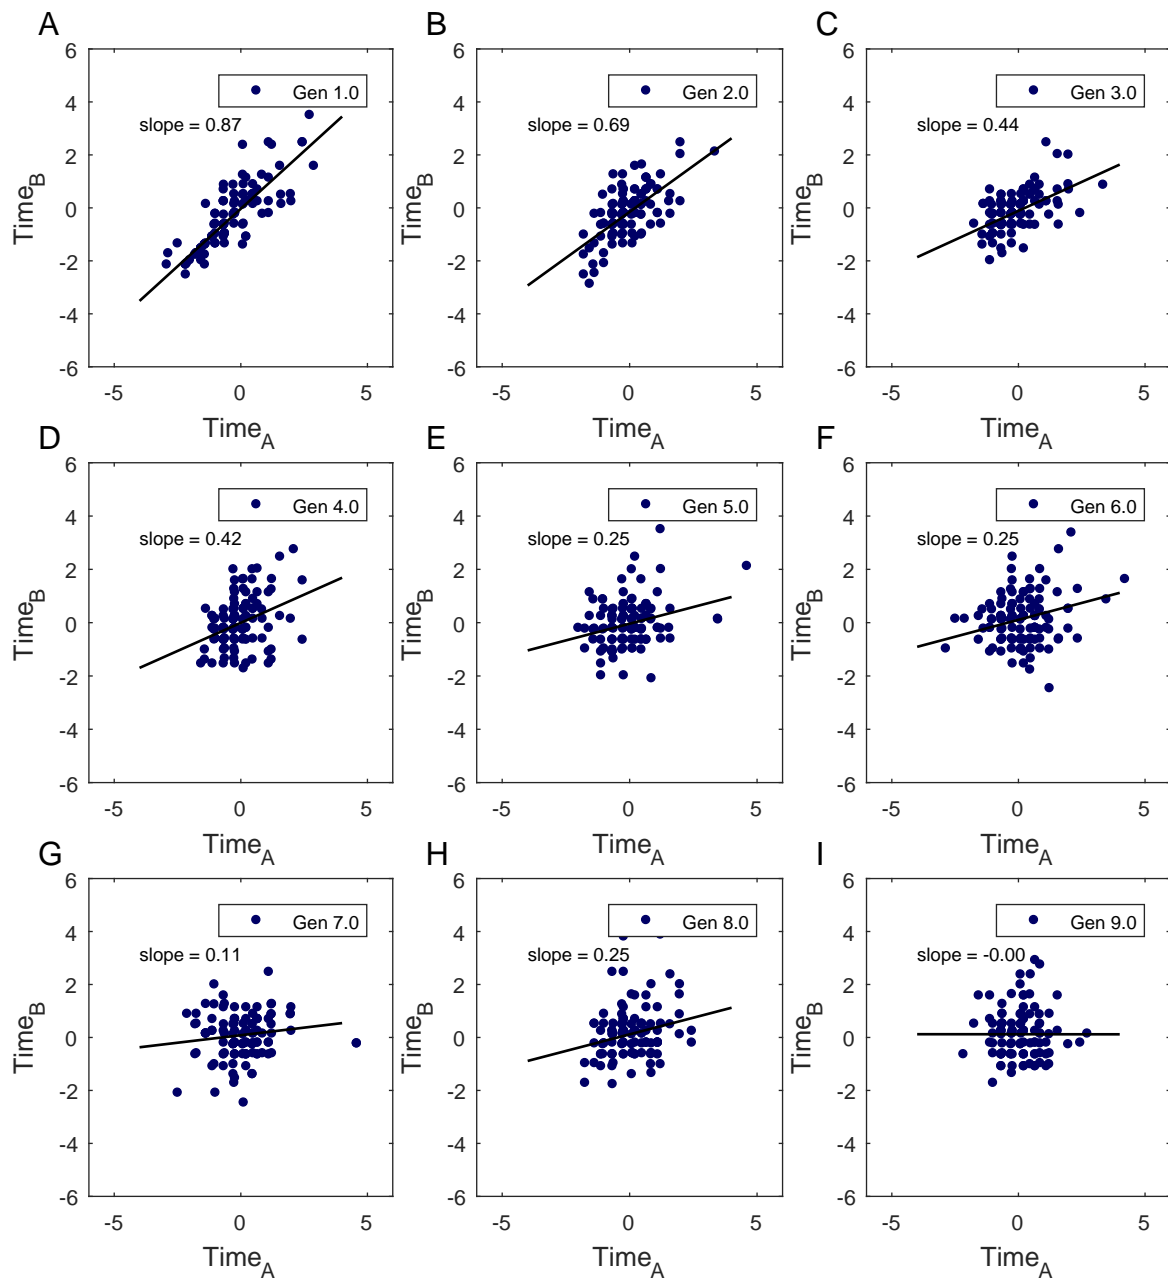

Supplement: supp [file elife-64779-supp-v1.zip]

A

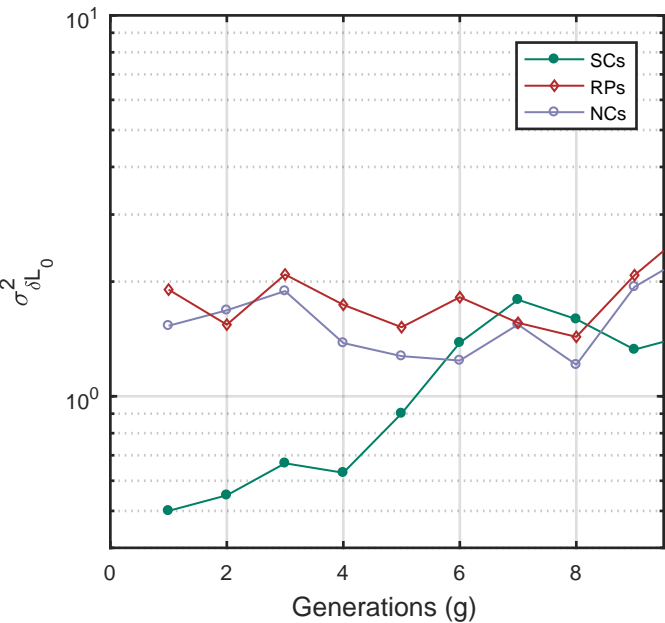

B

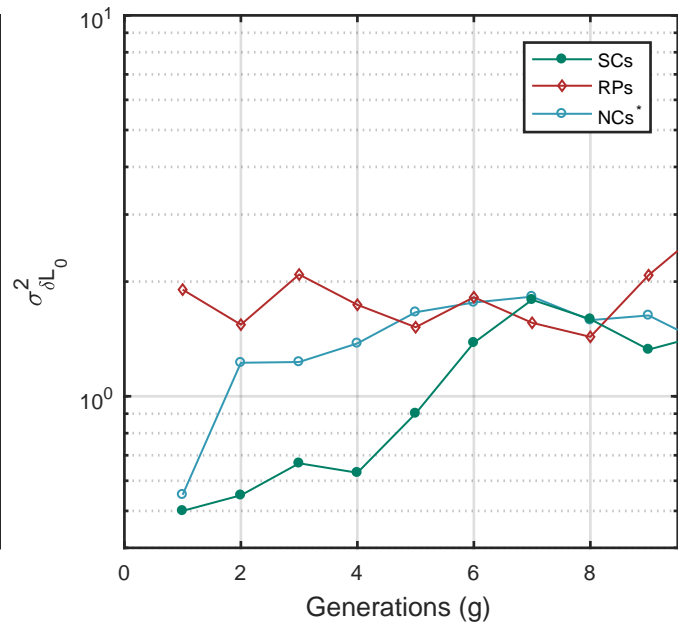

Supplement: supp [file elife-64779-supp-v1.zip]

A

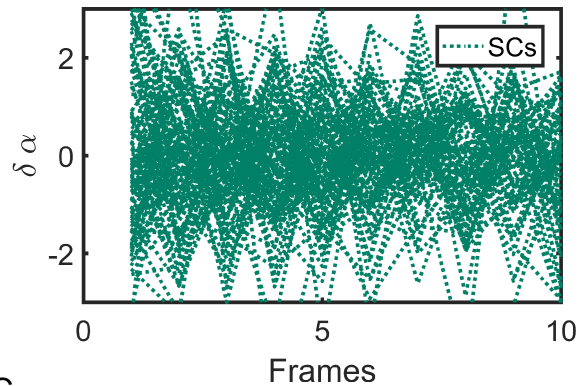

B

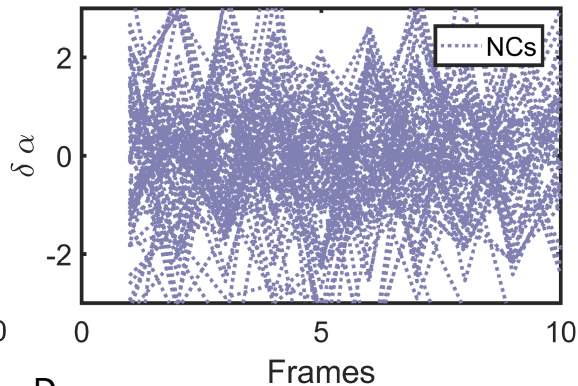

C

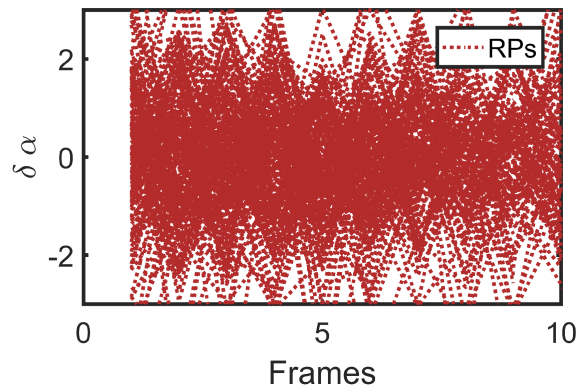

D

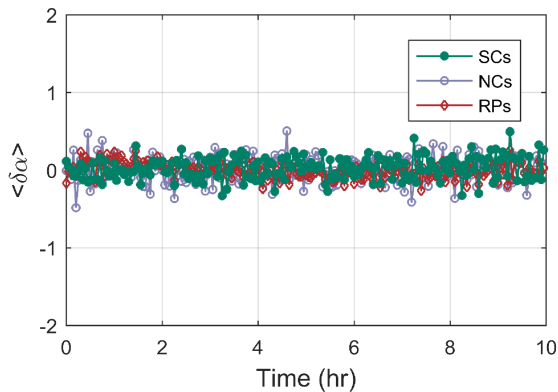

Supplement: supp [file elife-64779-supp-v1.zip]

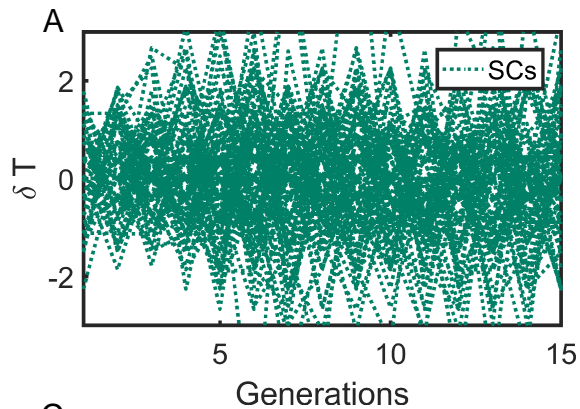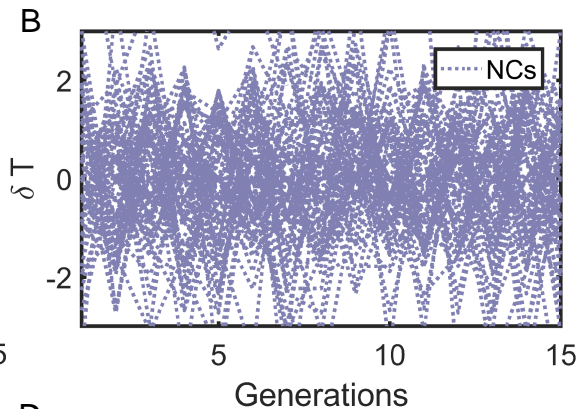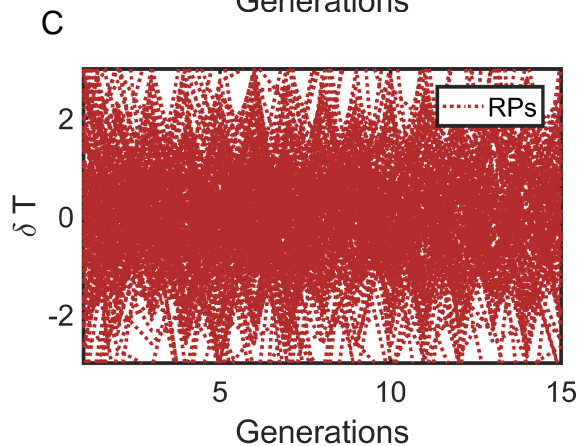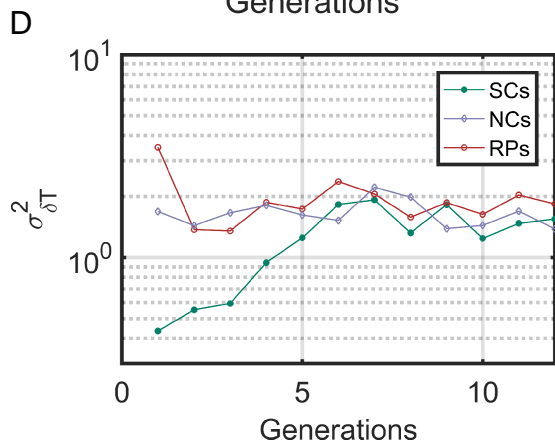

Supplement: supp [file elife-64779-supp-v1.zip]

A

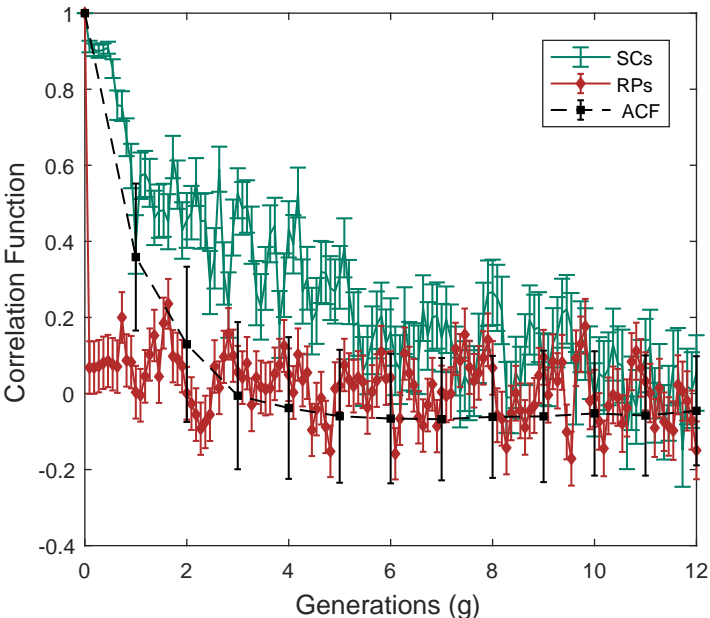

B

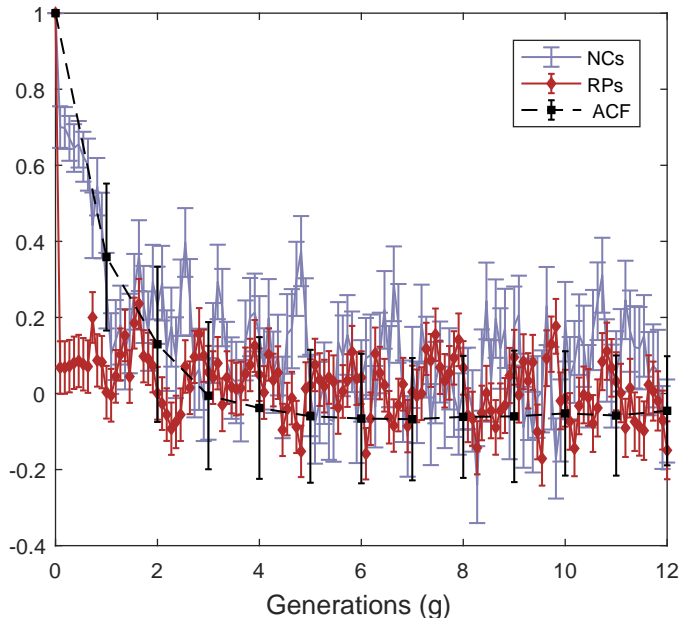

Supplement: supp [file elife-64779-supp-v1.zip]

A

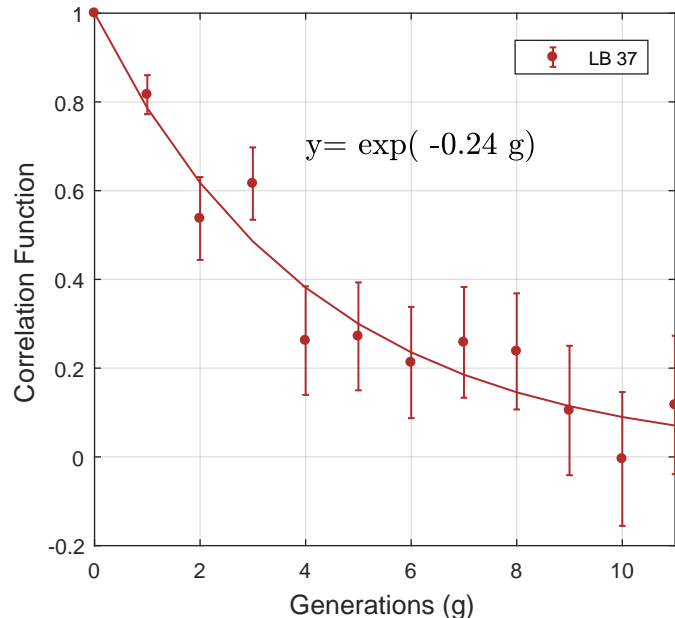

B

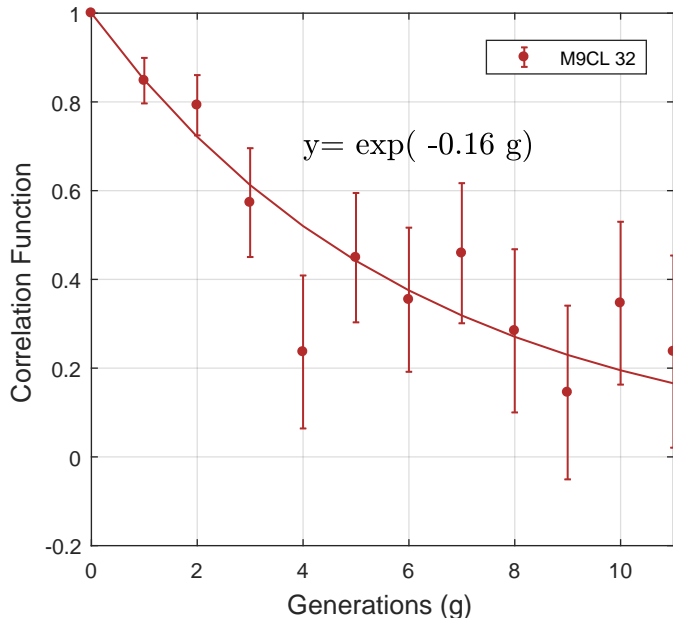

Supplement: supp [file elife-64779-supp-v1.zip]

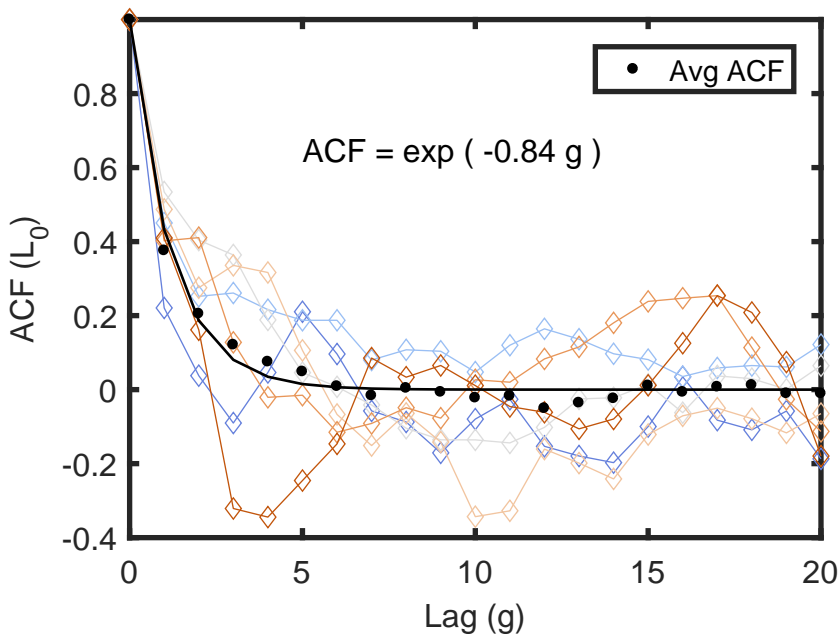

Supplement: supp [file elife-64779-supp-v1.zip]

A

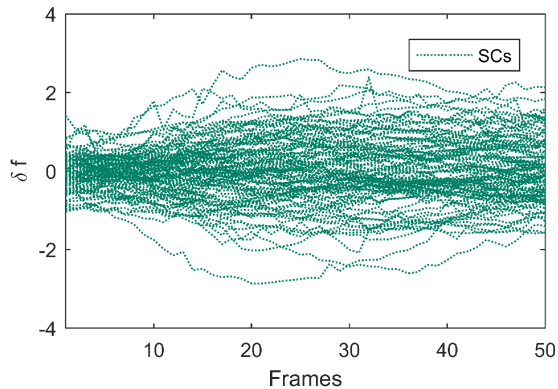

B

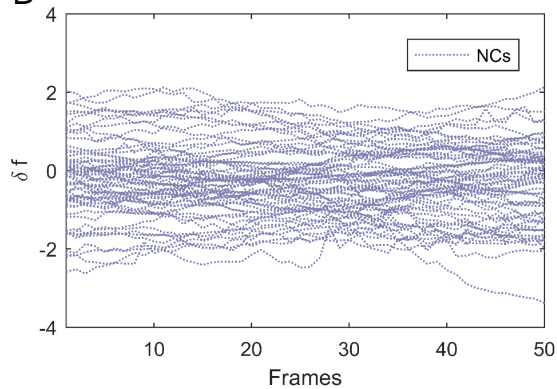

C

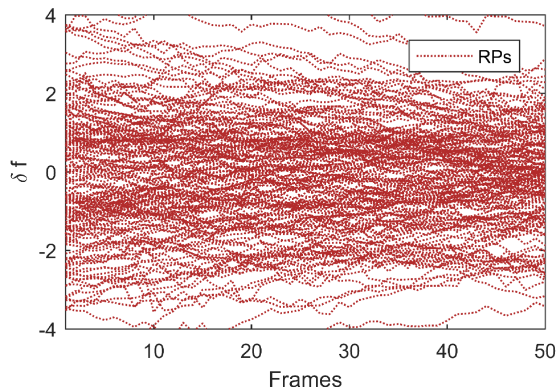

D

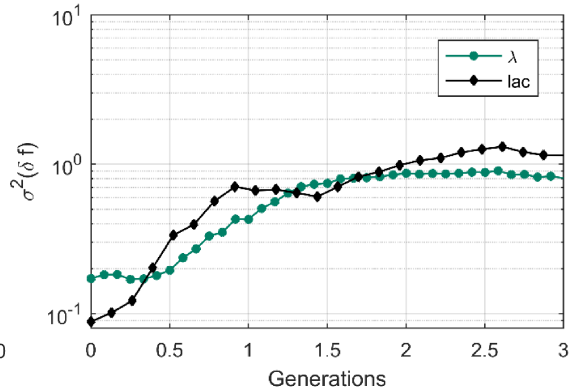

Supplement: supp [file elife-64779-supp-v1.zip]

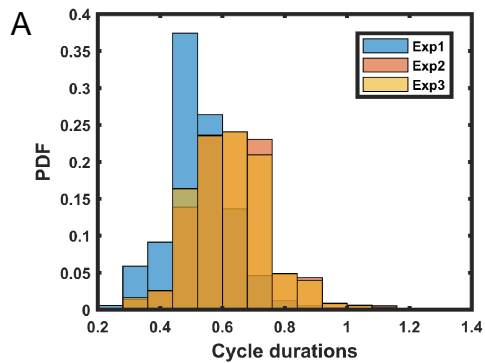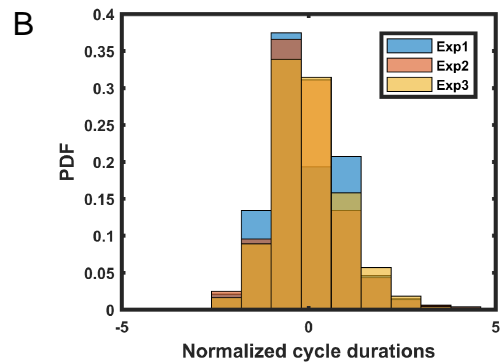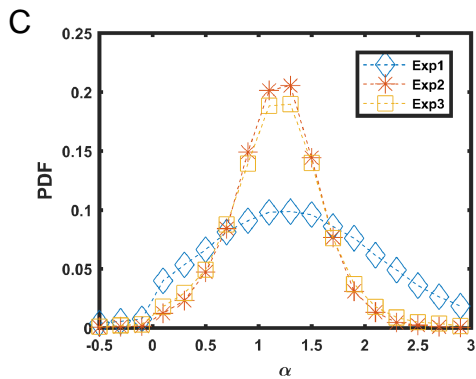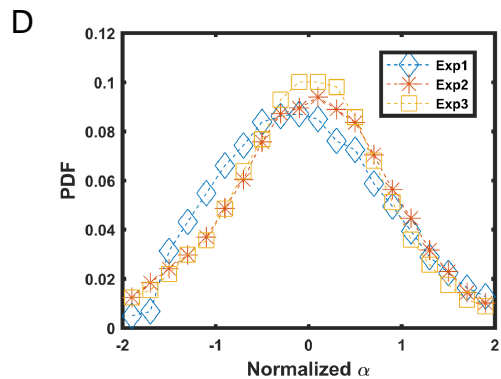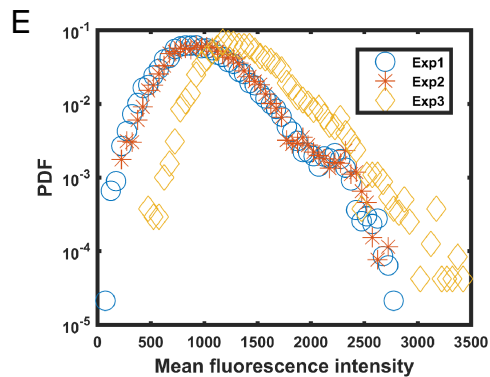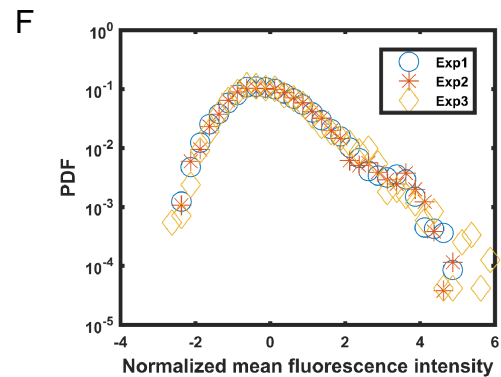

Supplement: supp [file elife-64779-supp-v1.zip]

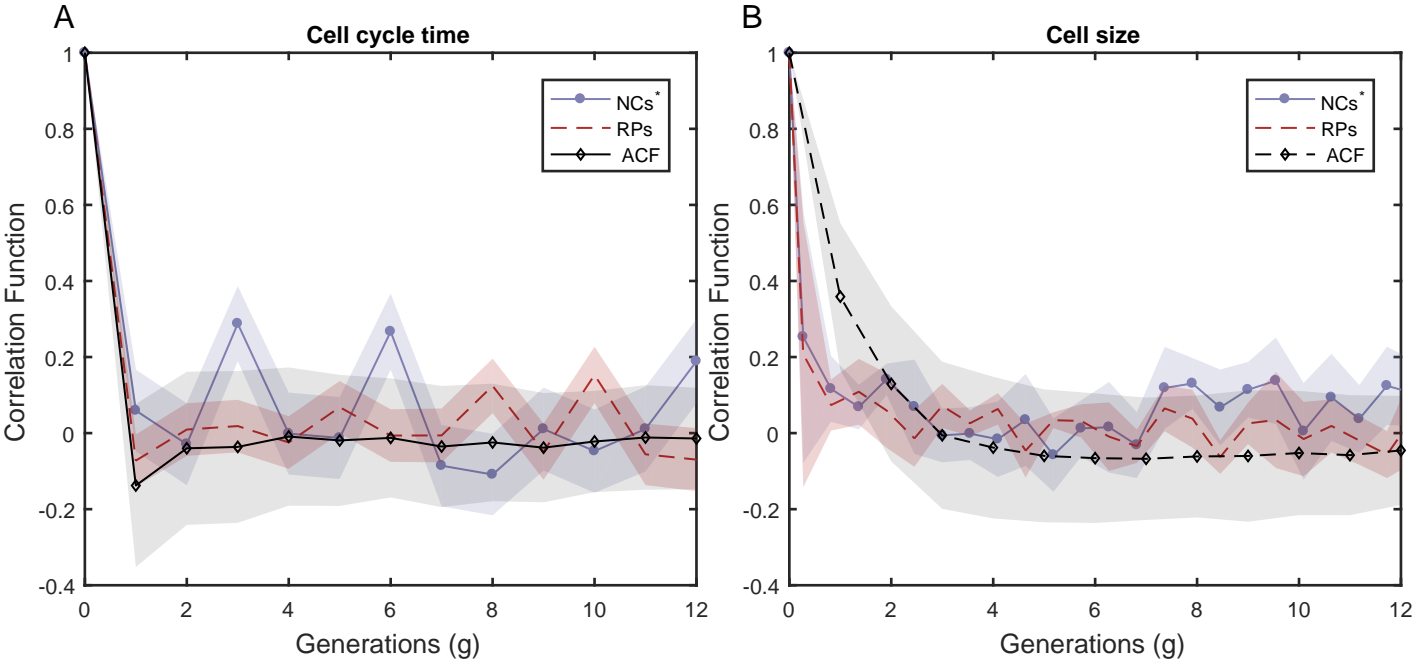

Supplement: supp [file elife-64779-supp-v1.zip]
